# Supplementary material for: Technical Note on high-frequency, multi-elemental stream water monitoring: experiences, feedbacks, and suggestions from seven years of running three French field laboratories (Riverlabs)
Source: Copernicus journal article supplement (doi:10.5194/egusphere-2024-902), 2024-04-03
Supplement: Supplementary file [file egusphere-2024-902-AC1-supplement.pdf]

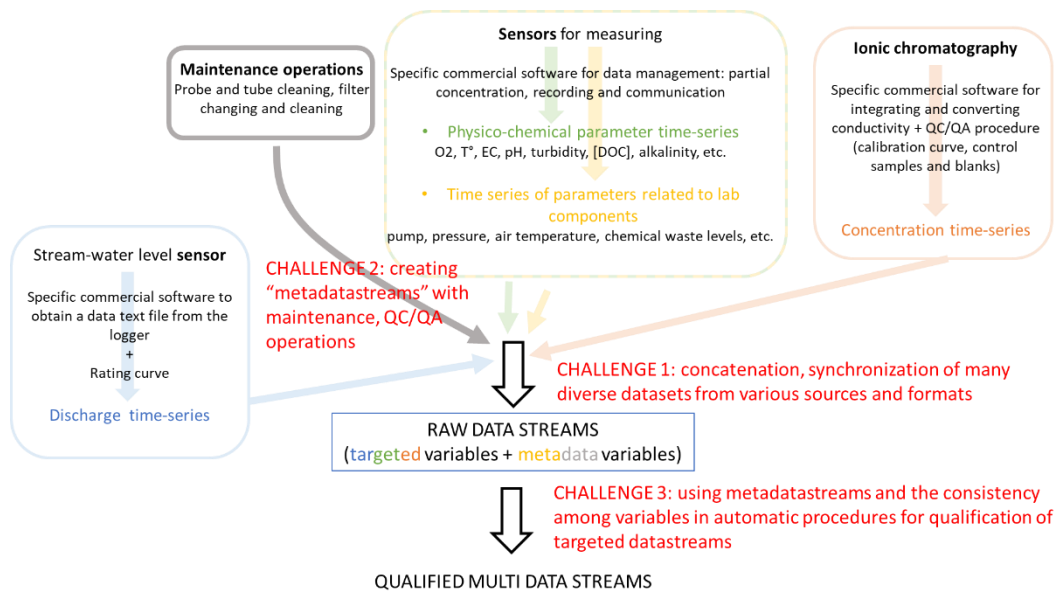

Figure 9: Data management workflow of the Critex Riverlabs and associated challenges. QC/QA: quality control/quality assurance; O<sub>2</sub>: dissolved oxygen concentration, T°: water temperature, EC: electrical conductivity in water; [DOC]: dissolved organic carbon concentration

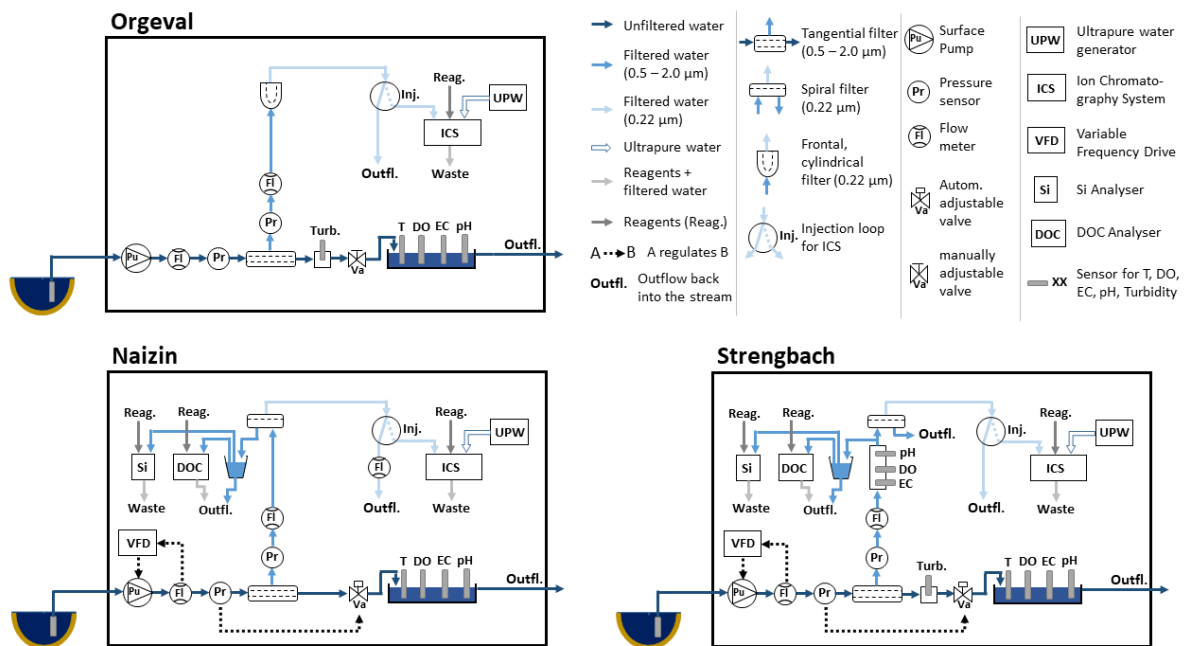

New Figure 1: Diagrams of the three Riverlab prototypes.
